# Supplementary material
Source: PubMed Central journal article supplement (PMC5359014)

**Figure S1**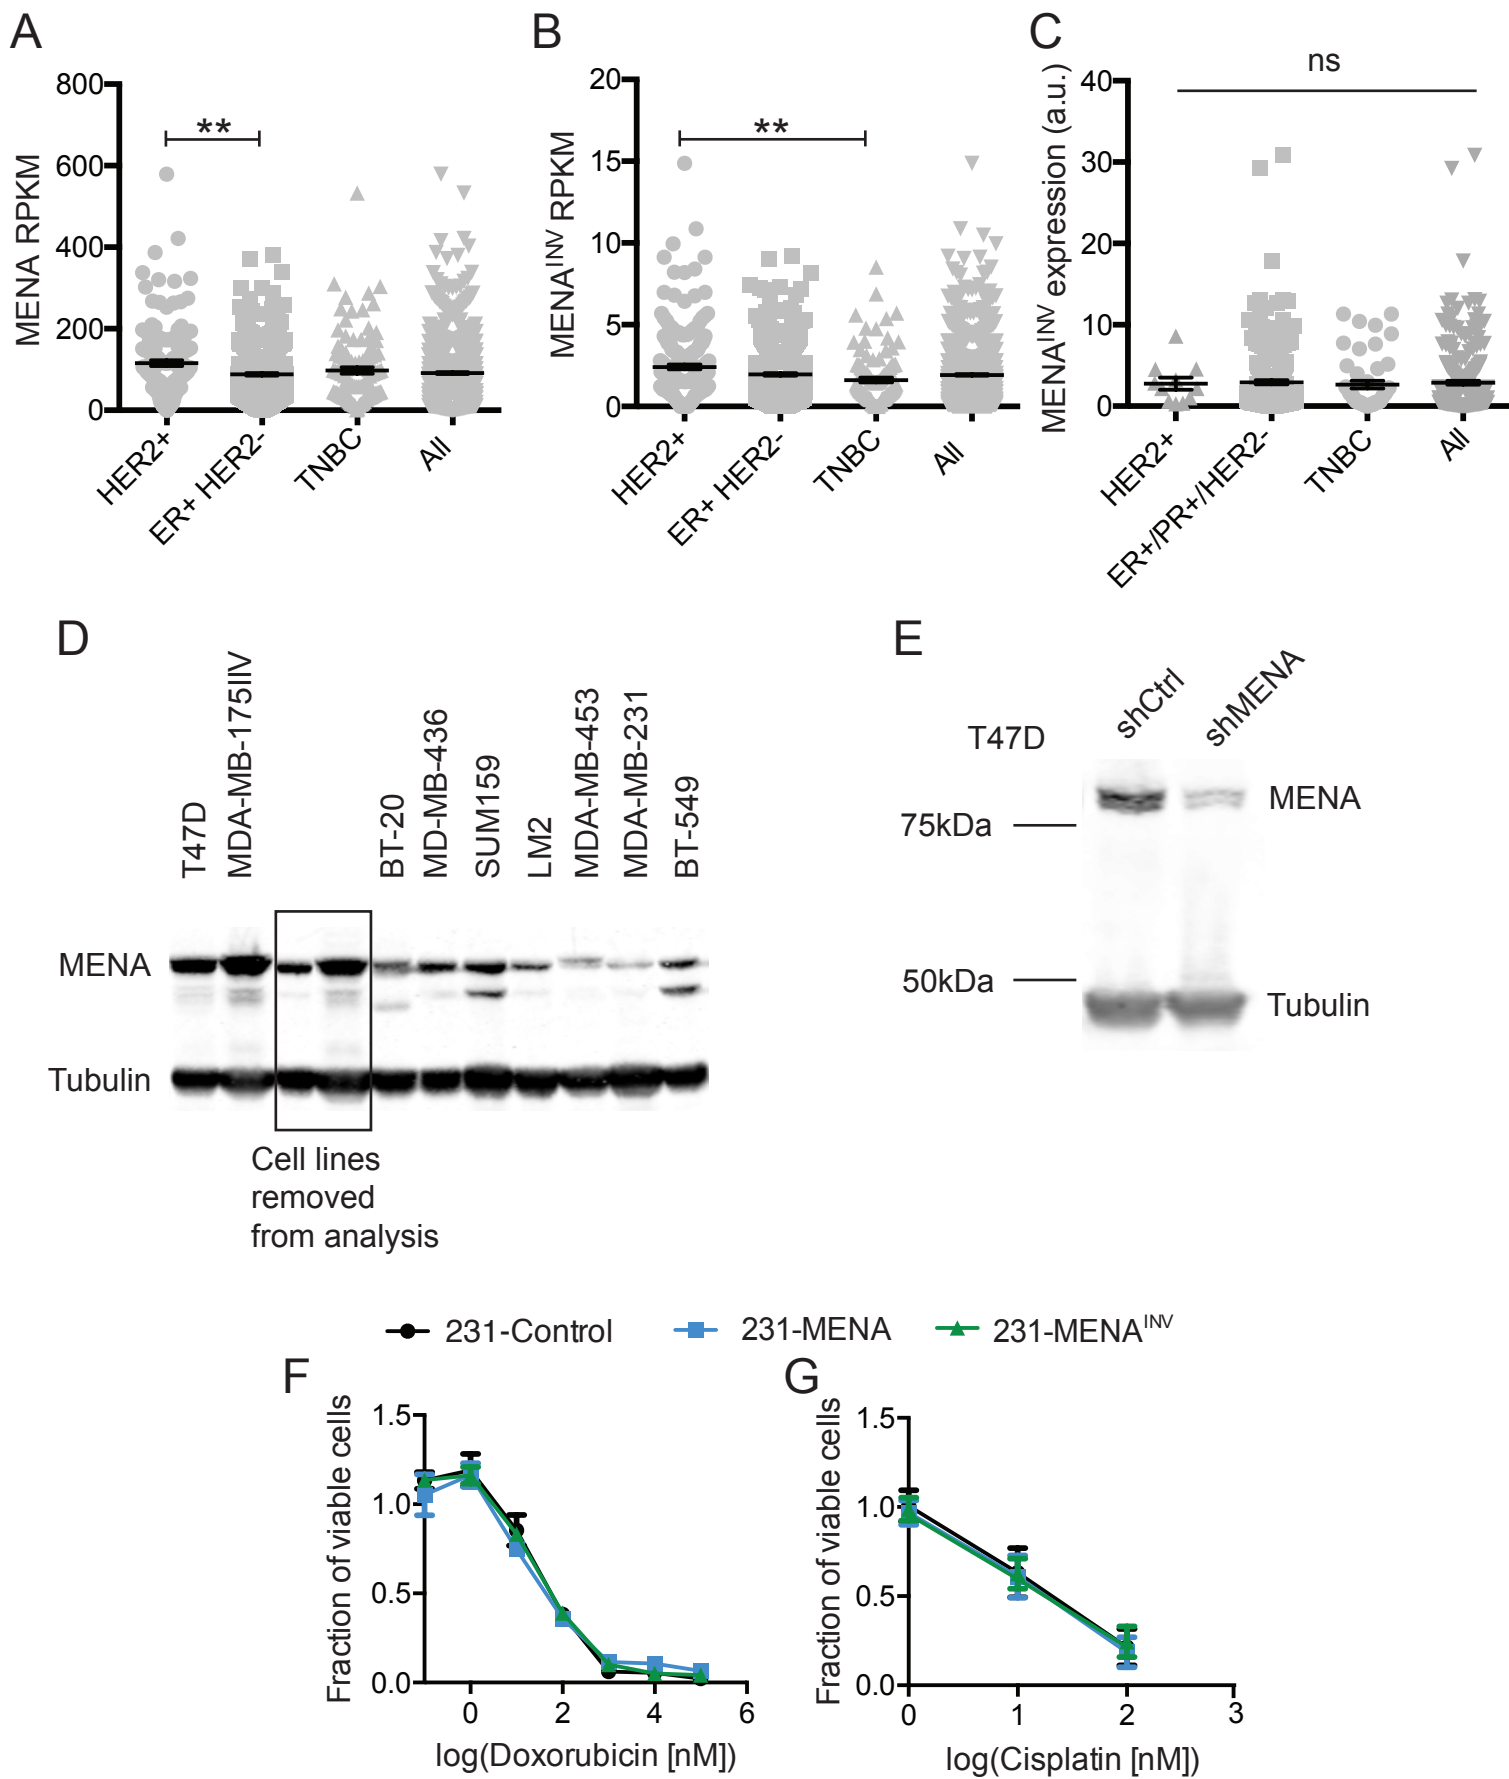

Supplement: NIHMS827549-supplement-1.pdf [file NIHMS827549-supplement-1.pdf]

Figure S2

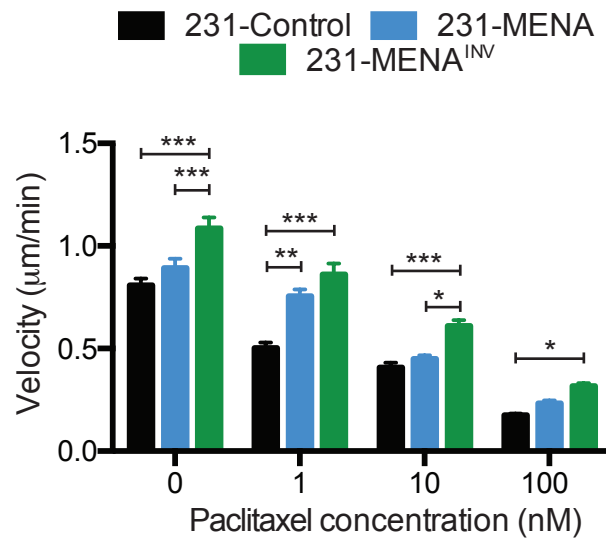

Supplement: NIHMS827549-supplement-2.pdf [file NIHMS827549-supplement-2.pdf]

**Figure S3**

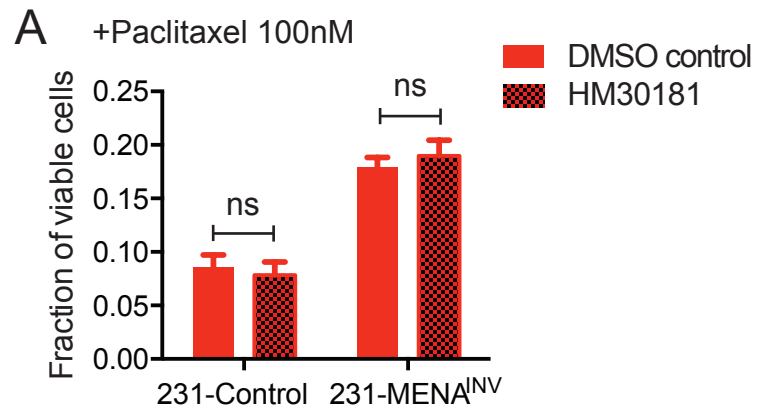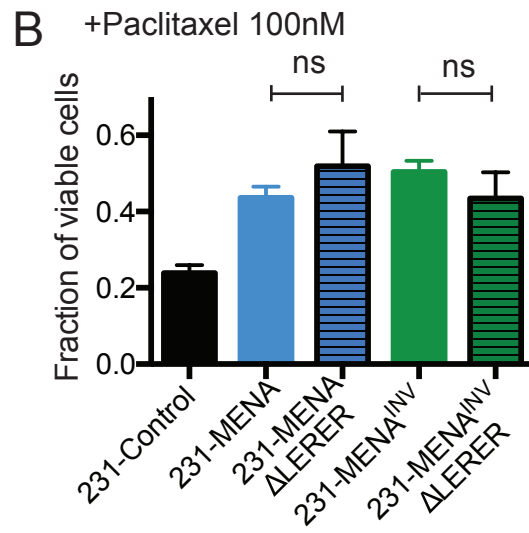

Supplement: NIHMS827549-supplement-3.pdf [file NIHMS827549-supplement-3.pdf]

**Figure S4**

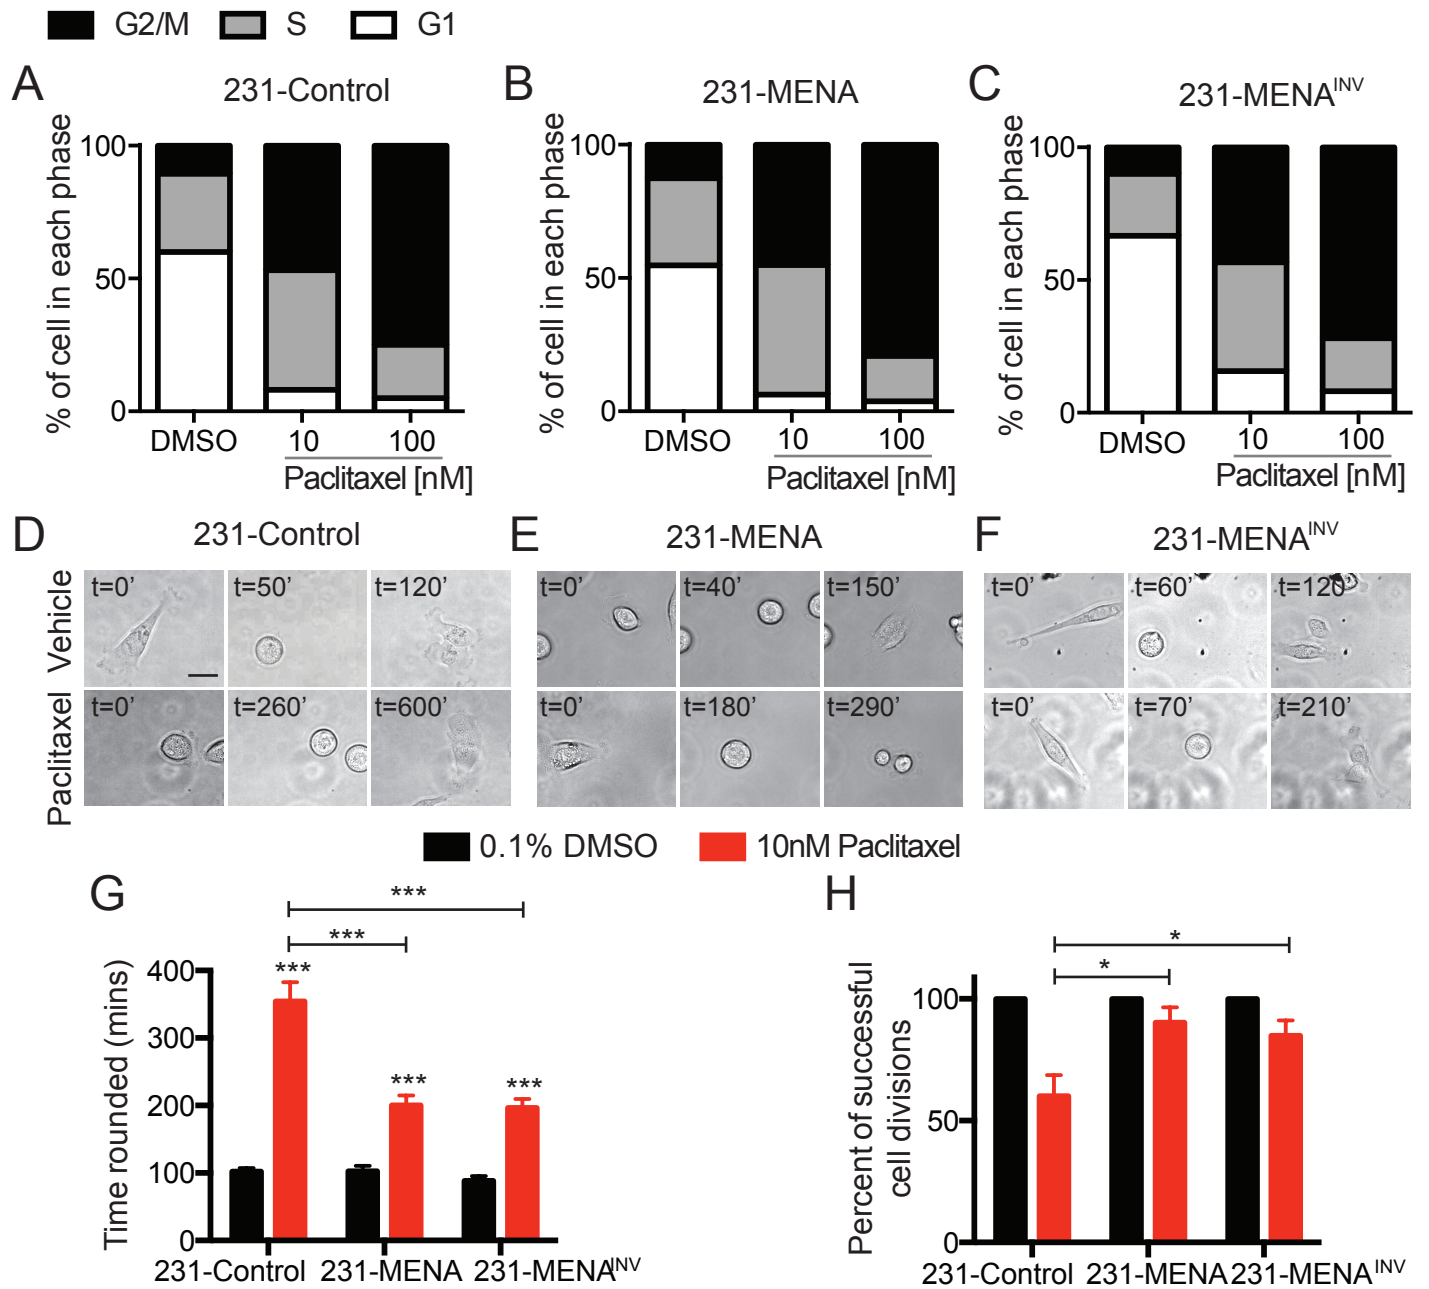

Supplement: NIHMS827549-supplement-4.pdf [file NIHMS827549-supplement-4.pdf]

**Figure S5**

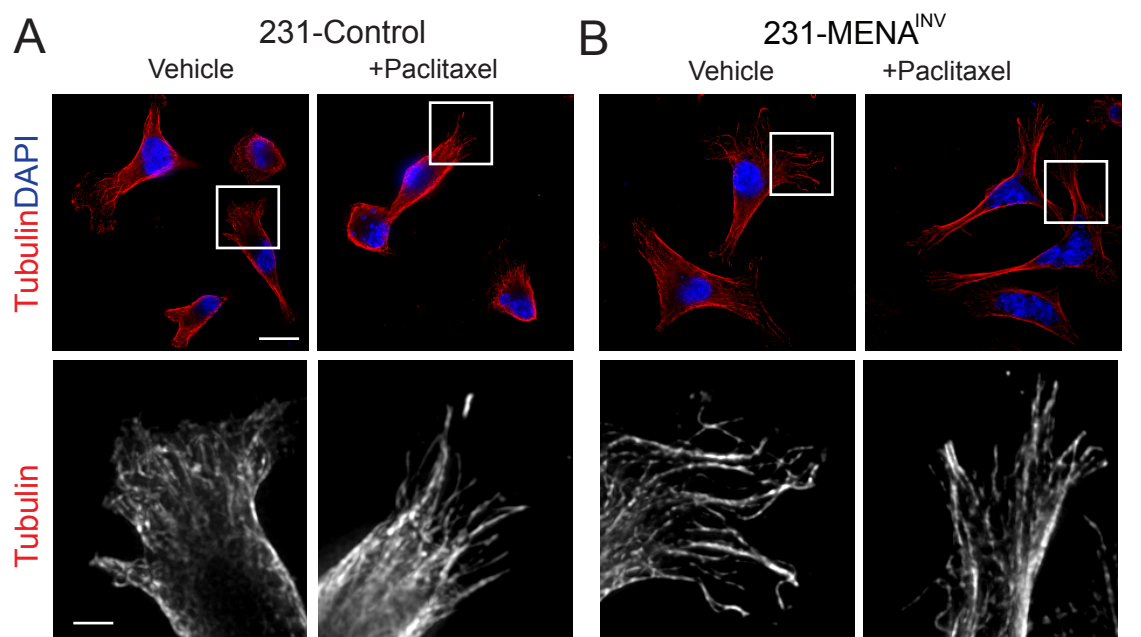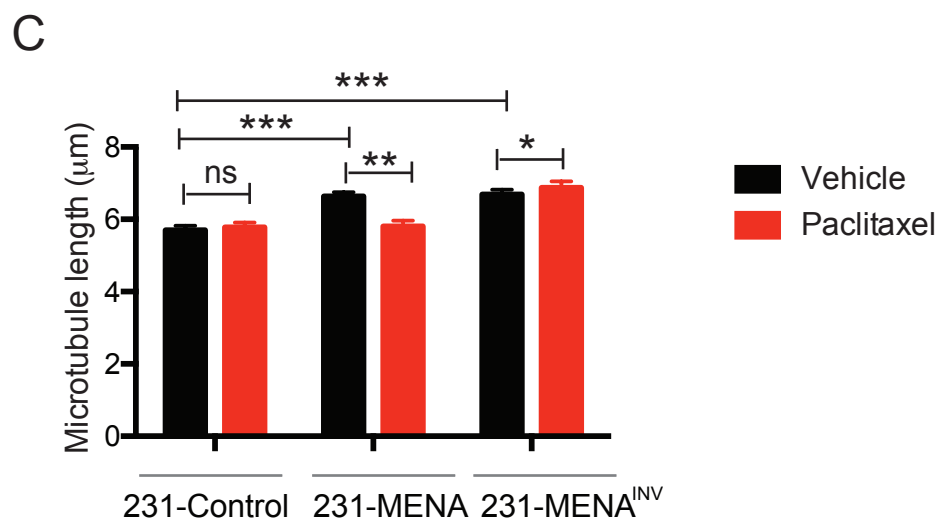

Supplement: NIHMS827549-supplement-5.pdf [file NIHMS827549-supplement-5.pdf]

# Figure S6

231-Control 
  231-MENA 
  231-MENA<sup>INV</sup>

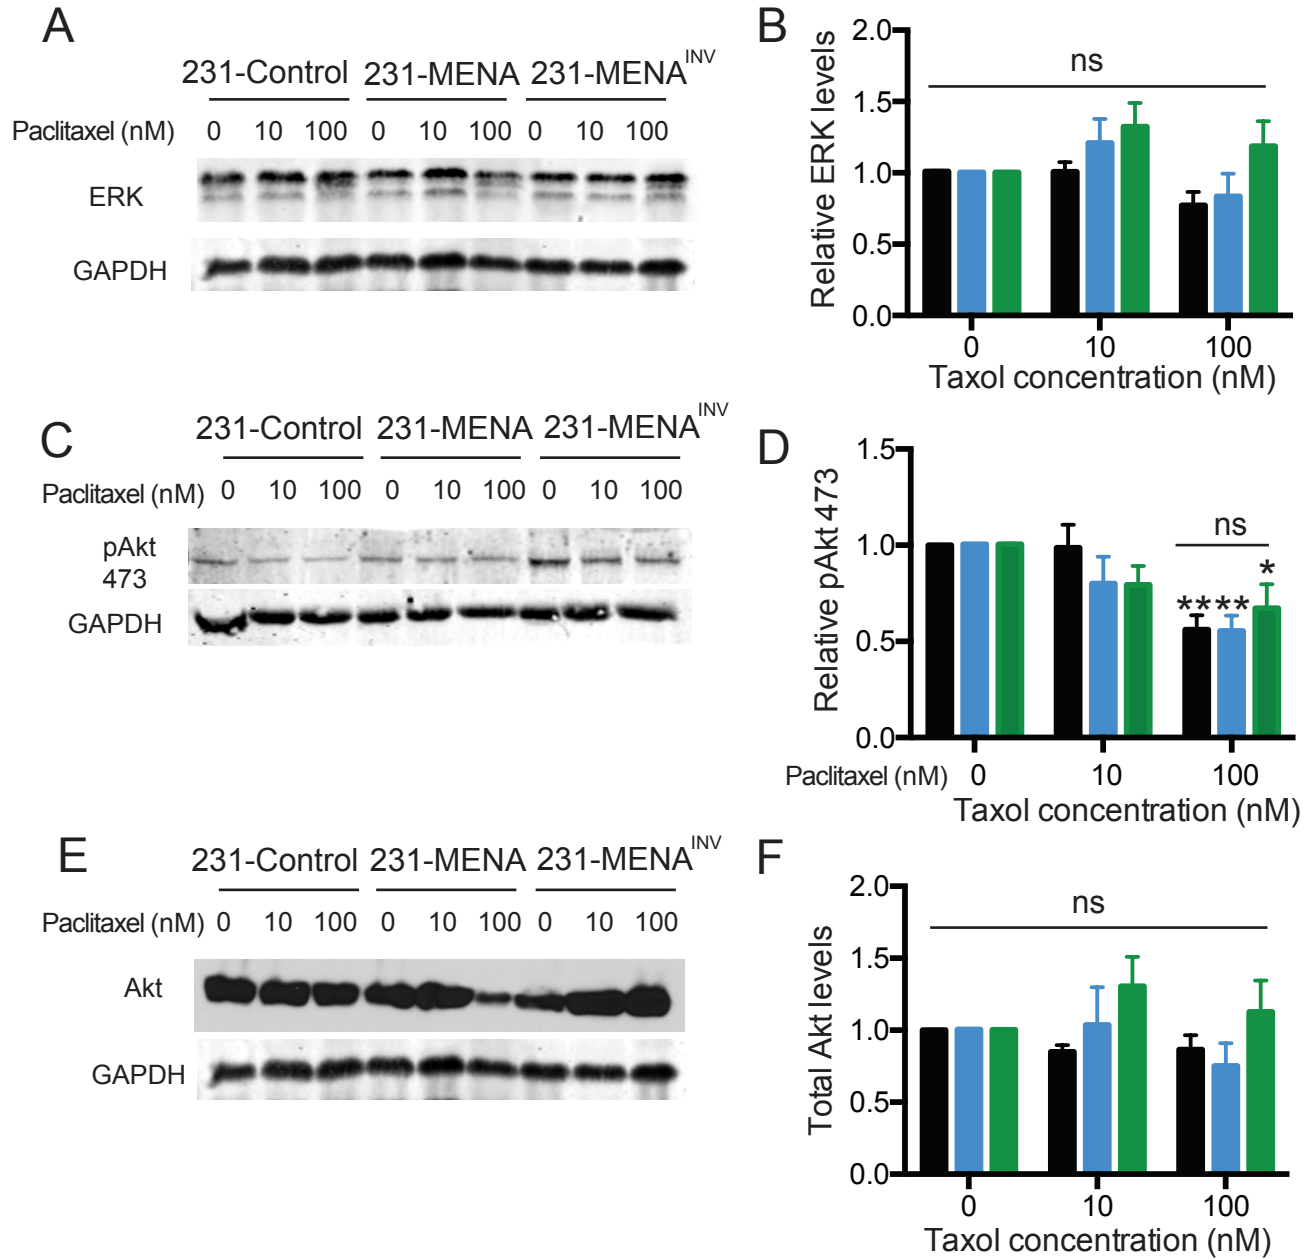

Supplement: NIHMS827549-supplement-6.pdf [file NIHMS827549-supplement-6.pdf]
